# Supplementary material for: Ultrasmall iridium nanoparticles on graphene for efficient nitrogen reduction reaction
Source: Royal Society of Chemistry journal article supplement (doi:10.1039/d1nj05843f), 2022-01-01
Supplement: d1nj05843f1.pdf [file d1nj05843f1.pdf]

## Experimental Section

### *Synthesis of Ir/RGO*

All chemical reagents were of analytical grade from commercial sources and were not purified during use. As depicted in Fig. 1a, Ir/RGO was prepared by a one-pot hydrothermal process assisted by the microwave treatment. Briefly, 50 mg of graphene oxide (GO) was firstly dispersed in distilled water under ultrasonication for 1 h, followed by adding 10 mg of  $\text{IrCl}_3 \cdot 3\text{H}_2\text{O}$  under ultrasonication for another 10 min. Afterwards, the mixed solutions were sealed into a quartz tube, which were reacted for 15 min under microwave irradiation (2450 MHz). Afterwards, the precipitates were collected through centrifuging, washing with deionized water/ethanol, and drying under vacuum.

### *Electrochemical experiments*

All the electrochemical performance measurements were carried out using a CHI-760E electrochemical workstation (CH Instrument Inc.) at room temperature. In a three-electrode system, Ag/AgCl (saturated KCl), graphite rod and as-prepared carbon cloth (CC) sample were used as reference, counter and working electrodes, respectively. All potentials were converted to the reversible hydrogen electrode (RHE) scale according to:  $E_{\text{RHE}} (\text{V}) = E_{\text{Ag/AgCl}} + 0.197 + 0.059 \times \text{pH}$ . The working electrodes were fabricated by drop-casting 20  $\mu\text{L}$  of catalyst ink onto carbon paper to achieve a loading density of  $0.2 \text{ mg} \cdot \text{cm}^{-2}$ . The catalyst ink was prepared by dispersing 1 mg of the catalysts in 100  $\mu\text{L}$  of ethyl alcohol containing 5  $\mu\text{L}$  of Nafion (5 wt%) under ultrasonication. The NRR measurements were conducted in a two-compartment electrochemical H-cell separated with a proton exchange membrane (Nafion 211, Dupont). The Nafion membrane was pretreated by heating it in 5%  $\text{H}_2\text{O}_2$  aqueous solution at 80 °C for 1 h and then in deionized water at 80 °C for another 1 h. Prior to NRR tests, all the feeding gases were purified through acid trap (0.05 M  $\text{H}_2\text{SO}_4$ ) and alkaline trap (0.1 M KOH) to remove any possible contaminants ( $\text{NH}_3$  and  $\text{NO}_x$ ). In the process of potentiostatic test, a flow of  $\text{N}_2$  (99.999%) with a rate of  $20 \text{ mL min}^{-1}$  was continuously fed to the cathodic compartment. After NRR electrolysis at

specified potentials for 2 h, the produced NH<sub>3</sub> was quantitatively determined by the indophenol blue method[1], and the possible byproduct (N<sub>2</sub>H<sub>4</sub>) was determined by the method of Watt and Chrisp[2]. The detailed determination procedures are given in our previous publications[3-5].

### ***Calculations of NH<sub>3</sub> yield and Faradaic efficiency***

$$\text{NH}_3 \text{ yield } (\mu\text{g h}^{-1} \text{ mg}_{\text{cat.}}^{-1}) = \frac{c_{\text{NH}_3} \times V}{t \times m} \quad (1)$$

Faradaic efficiency was calculated by the following equation:

$$\text{Faradaic efficiency } (\%) = \frac{3 \times F \times c_{\text{NH}_3} \times V}{17 \times Q} \times 100\% \quad (2)$$

where  $c_{\text{NH}_3}$  ( $\mu\text{g mL}^{-1}$ ) is the measured NH<sub>3</sub> concentration,  $V$  (mL) is the volume of the electrolyte,  $t$  (h) is the reduction time and  $m$  (mg) is the mass loading of the catalyst on CC.  $F$  (96500 C mol<sup>-1</sup>) is the Faraday constant,  $Q$  (C) is the quantity of applied electricity.

### ***Characterizations***

Transmission electron microscopy (TEM), high-resolution transmission electron microscopy (HRTEM) and selected area electron diffraction (SAED) were carried out on a Tecnai G<sup>2</sup> F20 microscope. X-ray diffraction (XRD) pattern was conducted on a Rigaku D/max 2400 diffractometer. X-ray photoelectron spectroscopy (XPS) analysis was recorded on a PHI 5702 spectrometer. Dinitrogen temperature-programmed desorption (N<sub>2</sub>-TPD) profiles were performed on a Chem-BET 3000 (Quantachrome) apparatus. The UV-vis absorbance measurements were performed using a MAPADA P5 spectrophotometer. 1H nuclear magnetic resonance (NRM) measurements were carried out on a 500 MHz Bruker superconducting-magnet NMR spectrometer.

### ***Calculation details***

All the density functional theory (DFT) calculations were conducted with Cambridge sequential total energy package (CASTEP). The Perdew-Burke-Ernzerhof (PBE) functional with the generalized gradient approximation (GGA) was used to assess exchange-correlation contributions and the DFT-D method was chosen to describe van der Waals (vdW) interactions. A kinetic energy cutoff of 580 eV was

used for the plane wave expansion. The k-point grid was set at  $4 \times 4 \times 1$  for surface calculations. The convergence threshold was set as  $10^{-5}$  eV for total energy. The vacuum layers were larger than 15 Å above all the planes to avoid the unphysical interaction between periodic images.

The adsorption energy ( $\Delta E$ ) is defined as [6]

$$\Delta E = E_{\text{ads/slab}} - E_{\text{ads}} - E_{\text{slab}} \quad (3)$$

where  $E_{\text{ads/slab}}$ ,  $E_{\text{ads}}$  and  $E_{\text{slab}}$  are the total energies for adsorbed species on slab, adsorbed species and isolated slab, respectively.

The Gibbs free energy ( $\Delta G$ , 298 K) of reaction steps is calculated by [6]:

$$\Delta G = \Delta E + \Delta ZPE - T\Delta S \quad (4)$$

where  $\Delta E$  is the adsorption energy,  $\Delta ZPE$  is the zero point energy difference and  $T\Delta S$  is the entropy difference between the gas phase and adsorbed state. The entropies of free gases were acquired from the NIST database.

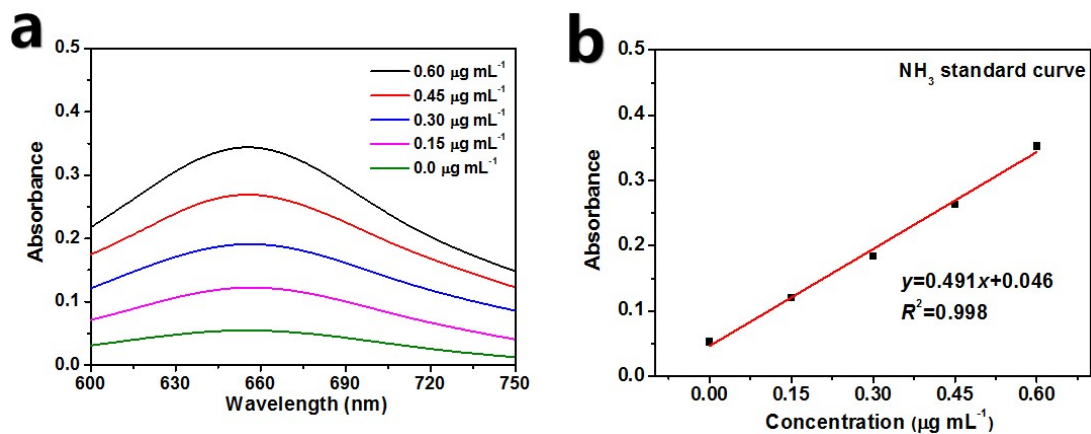

Fig. S1. (a) UV-vis absorption spectra of indophenol assays with  $\text{NH}_4\text{Cl}$  after incubated for 2 h at ambient conditions. (b) Calibration curve used for calculation of  $\text{NH}_3$  concentrations.

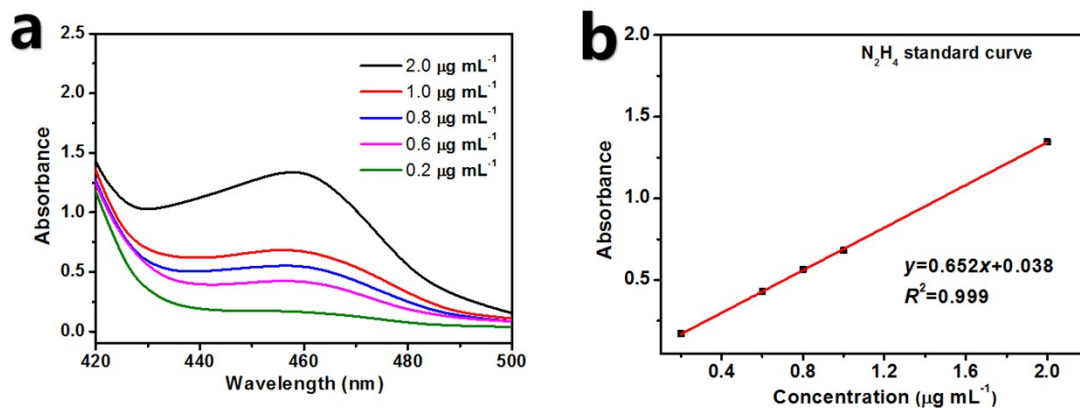

Fig. S2. (a) UV-vis absorption spectra of  $N_2H_4$  assays after incubated for 20 min at ambient conditions. (b) Calibration curve used for calculation of  $N_2H_4$  concentrations.

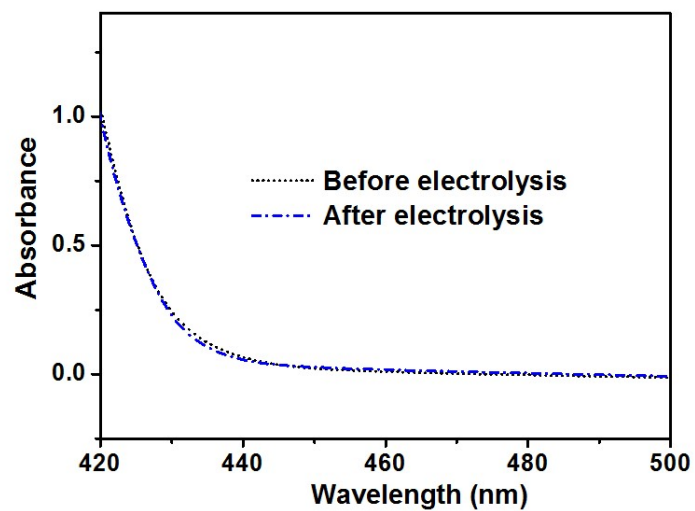

Fig. S3. UV-vis spectra of the electrolytes (stained with the chemical indicator based on the method of Watt and Chrisp) before and after 2 h of NRR electrolysis over Ir/RGO at -0.3 V.

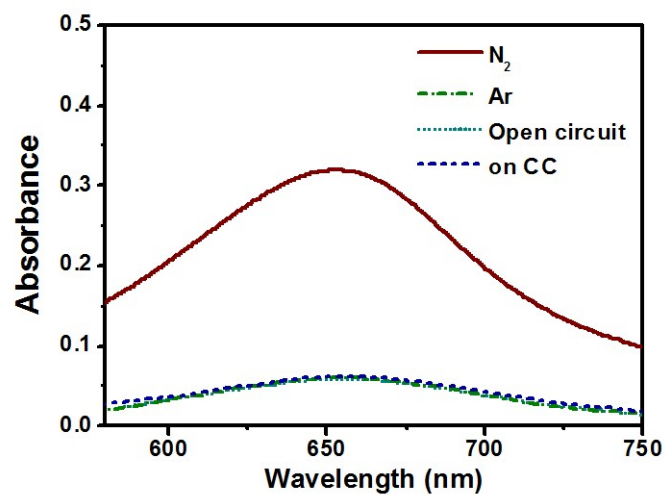

Fig. S4. UV-vis absorption spectra of working electrolytes after 2 h of electrolysis in Ar-saturated solutions on Ir/RGO at -0.3 V, N<sub>2</sub>-saturated solution on Ir/RGO at open circuit, and N<sub>2</sub>-saturated solution on pristine CC at -0.3 V.

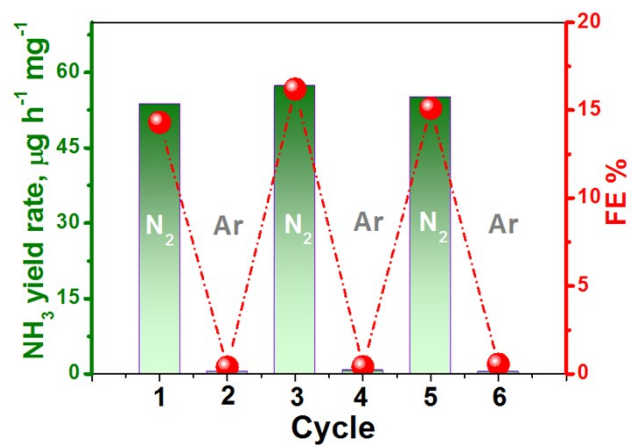

Fig. S5. Switching test in Ar- and N<sub>2</sub>-saturated solution for NRR electrocatalysis over Ir/RGO at -0.3 V.



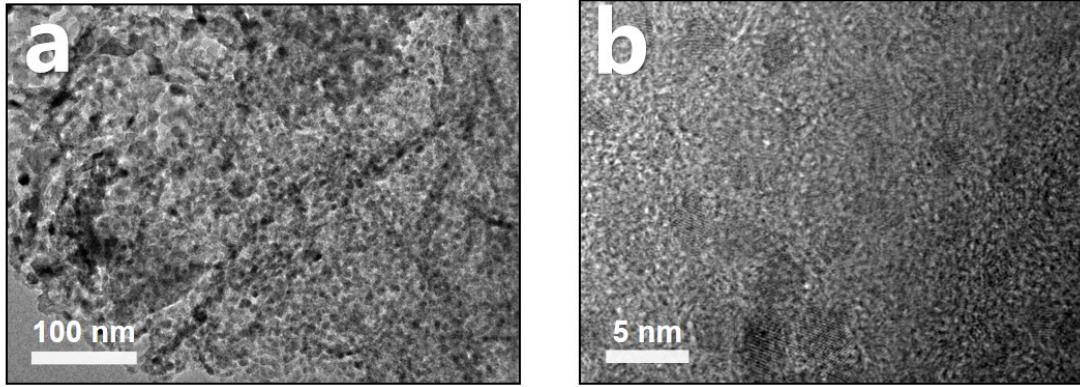

Fig. S6. (a) TEM and (b) HRTEM images of Ir/RGO after stability test.

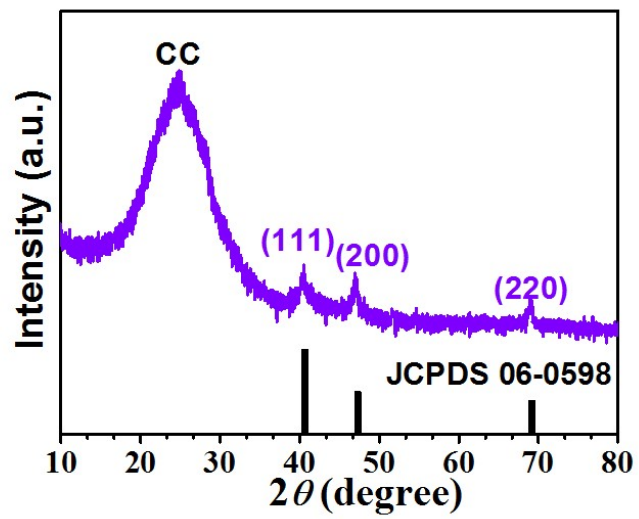

Fig. S7. XRD pattern of Ir/RGO after stability test.

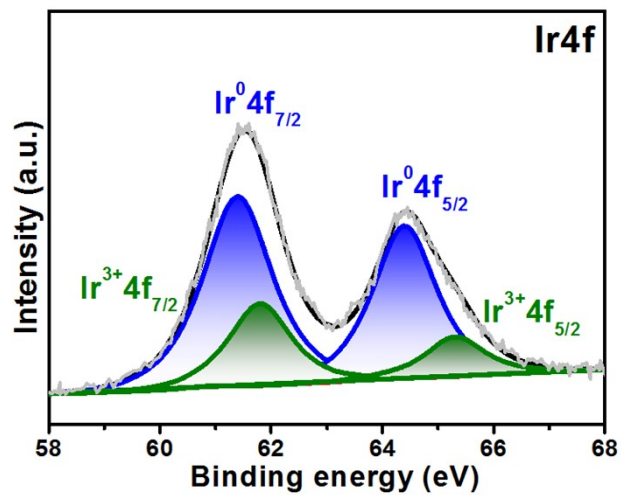

Fig. S8. XPS Ir4f spectrum of Ir/RGO after stability test.

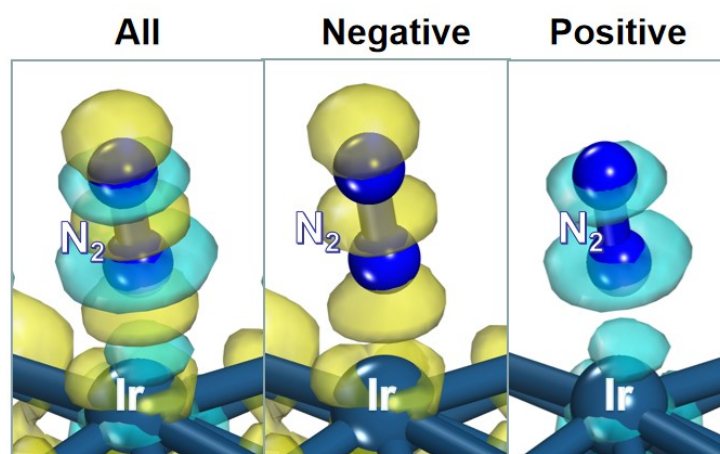

Fig. S9. Differential charge density of absorbed  $N_2$  on Ir/RGO. Yellow and cyan isosurfaces represent electron accumulation and electron depletion, respectively.

Table S1. Comparison of the optimum NH<sub>3</sub> yield and Faradic efficiency (FE) for the state-of-the-art NRR electrocatalysts at ambient conditions

| Catalyst                                | Electrolyte                           | Potential (V vs RHE) | NH <sub>3</sub> yield rate (μg h <sup>-1</sup> mg <sup>-1</sup> ) | FE (%)       | Ref.             |
|-----------------------------------------|---------------------------------------|----------------------|-------------------------------------------------------------------|--------------|------------------|
| Mosaic Bi nanosheets                    | 0.1 M Na <sub>2</sub> SO <sub>4</sub> | -0.8                 | 13.23                                                             | 10.46        | [7]              |
| Mo <sub>2</sub> C/C                     | 0.5 M Li <sub>2</sub> SO <sub>4</sub> | -0.3                 | 11.3                                                              | 7.8          | [8]              |
| Black phosphorus                        | 0.01 M HCl                            | -0.7                 | 31.37                                                             | 5.07 (-0.6)  | [9]              |
| Au/CeO <sub>x</sub> -RGO                | 0.1 M KOH                             | -0.2                 | 8.31                                                              | 10.1         | [10]             |
| Au-TiO <sub>2</sub> sub-nanocluster     | 0.1 M HCl                             | -0.2                 | 21.4                                                              | 8.11         | [11]             |
| B <sub>4</sub> C nanosheet              | 0.1 M HCl                             | -0.75                | 26.57                                                             | 15.95        | [12]             |
| Defect-rich MoS <sub>2</sub> nanoflower | 0.1 M Na <sub>2</sub> SO <sub>4</sub> | -0.4                 | 29.28                                                             | 8.34         | [13]             |
| Sulfur-doped graphene                   | 0.1 M HCl                             | -0.6                 | 27.3                                                              | 11.5 (-0.5V) | [14]             |
| N-doped carbon spikes                   | 0.25 M LiClO <sub>4</sub>             | -1.19                | 97.18                                                             | 11.56        | [15]             |
| Mo single atoms                         | 0.1 M KOH                             | -0.3                 | 34                                                                | 14.6         | [16]             |
| Fe-N/C hybrid                           | 0.1 M KOH                             | -0.2                 | 34.83                                                             | 9.28         | [17]             |
| <b>Ir/RGO</b>                           | <b>0.5 M LiClO<sub>4</sub></b>        | <b>-0.3</b>          | <b>55.6</b>                                                       | <b>15.3</b>  | <b>This work</b> |

## Supplementary references

- [1]. D. Zhu, L. Zhang, R. E. Ruther and R. J. Hamers, *Nat. Mater.*, 2013, **12**, 836.
- [2]. G. W. Watt and J. D. Chrisp, *Anal. Chem.*, 1952, **24**, 2006-2008.
- [3]. Q. Li, Y. Guo, Y. Tian, W. Liu and K. Chu, *J. Mater. Chem. A*, 2020, **8**, 16195-16202.
- [4]. W. Gu, Y. Guo, Q. Li, Y. Tian and K. Chu, *ACS Appl. Mater. Inter.*, 2020, **12**, 37258-37264.
- [5]. K. Chu, J. Wang, Y. P. Liu, Q. Q. Li and Y. L. Guo, *J. Mater. Chem. A*, 2020, **8**, 7117-7124.
- [6]. A. A. Peterson, *Energy Environ. Sci.*, 2010, **3**, 1311-1315.
- [7]. L. Li, C. Tang, B. Xia, H. Jin, Y. Zheng and S.-Z. Qiao, *ACS Catal.*, 2019, **9**, 2902-2908.
- [8]. H. Cheng, L. X. Ding, G. F. Chen, L. Zhang, J. Xue and H. Wang, *Adv. Mater.*, 2018, **30**, 1803694.
- [9]. L. L. Zhang, L. X. Ding, G. F. Chen, X. F. Yang and H. H. Wang, *Angew. Chem. Int. Edit.*, 2019, **131**, 2638-2642.
- [10]. S. J. Li, D. Bao, M. M. Shi, B. R. Wulan, J. M. Yan and Q. Jiang, *Adv. Mater.*, 2017, **29**, 1700001.
- [11]. M. M. Shi, D. Bao, B. R. Wulan, Y. H. Li, Y. F. Zhang, J. M. Yan and Q. Jiang, *Adv. Mater.*, 2017, **29**, 1606550.
- [12]. W. Qiu, X.-Y. Xie, J. Qiu, W.-H. Fang, R. Liang, X. Ren, X. Ji, G. Cui, A. M. Asiri and G. Cui, *Nat. Commun.*, 2018, **9**, 3485.
- [13]. X. Li, T. Li, Y. Ma, Q. Wei, W. Qiu, H. Guo, X. Shi, P. Zhang, A. M. Asiri and L. Chen, *Adv. Energy Mater.*, 2018, **8**, 1801357.
- [14]. L. Xia, J. Yang, H. Wang, R. Zhao, H. Chen, W. Fang, A. M. Asiri, F. Xie, G. Cui and X. Sun, *Chem. Commun.*, 2019, **55**, 3371-3374.
- [15]. Y. Song, D. Johnson, R. Peng, D. K. Hensley, P. V. Bonnesen, L. Liang, J. Huang, F. Yang, F. Zhang and R. Qiao, *Sci. Adv.*, 2018, **4**, e1700336.
- [16]. L. Han, X. Liu, J. Chen, R. Lin, H. Liu, F. Lu, S. Bak, Z. Liang, S. Zhao and E. Stavitski, *Angew. Chem. Int. Edit.*, 2018, **58**, 2321-2325.
- [17]. Y. Wang, X. Cui, J. Zhao, G. Jia, L. Gu, Q. Zhang, L. Meng, Z. Shi, L. Zheng and C. Wang, *ACS Catal.*, 2018, **9**, 336-344.
